# Supplementary material for: Precision Nutrition in NAFLD: Effects of a High-Fiber Intervention on the Serum Metabolome of NAFD Patients—A Pilot Study
Source: MDPI journal article supplement (doi:10.3390/nu14245355), 2022-12-16
Supplement: s1 [file s1]

Supplementary Table S1. Dietary intake of studied patients at baseline and endpoint.

| Parameter                             | Timepoint 1<br>median (range) | Timepoint 2<br>median (range) | p-value<br>from t-<br>test | p- value |                                                      |
|---------------------------------------|-------------------------------|-------------------------------|----------------------------|----------|------------------------------------------------------|
| Energy from protein (%)               | 21.49 (12.6 - 33.4),          | 21.81 (10.7 - 28),            | 0.76,                      | 0.84     | Paired t-test                                        |
| Energy from fat (%)                   | 31.8 (17.7 - 52.7),           | 33.56 (15.2 - 51.9),          | 0.52,                      | 0.84,    | Paired t-test                                        |
| Energy from carbohydrates (%)         | 43.5 (21 - 61.3),             | 42.09 (20.8 - 69),            | 0.80,                      | 0.84,    | Paired t-test                                        |
| Water (g)                             | 1324.2 (471 - 2658.2)         | 1228 (444.9 - 3453.6),        | 0.10,                      | 0.44,    | Wilcoxon signed rank test with continuity correction |
| Total protein (g)                     | 73.9 (47.4 - 133.7),          | 70.57 (47.7 - 01.7),          | 0.36,                      | 0.84,    | Paired t test                                        |
| Fat (g)                               | 50.9 (16.5 - 134),            | 51 (23.1 - 88.2),             | 0.40,                      | 0.84,    | Wilcoxon signed rank test                            |
| Carbohydrate (g)                      | 174.4 (60.4 - 364.2),         | 160.4 (54.5 - 75.8),          | 0.59,                      | 0.84,    | Wilcoxon signed rank test with continuity correction |
| Starch (g)                            | 73.1 (21 - 159.2),            | 79.36 (22.6 - 180.8),         | 0.68,                      | 0.84,    | Paired t-test                                        |
| Polunsaturated Fatty acids (PUFA) (g) | 0.2 (0 - 5.2),                | 0.3 (0 - 2.8),                | 0.63,                      | 0.84,    | Wilcoxon signed rank                                 |
| Cholesterol (mg)                      | 288.86 (113.5 - 619),         | 265.8 (127.6 - 652.4),        | 0.75,                      | 0.84,    | Wilcoxon signed rank test                            |
| Sodium (mg)                           | 2007.9 (1063.2 - 4004.1),     | 2157.9 (970.1 - 4832.3),      | 0.93,                      | 0.93,    | Wilcoxon signed rank test with continuity correction |
| Pottasium (mg)                        | 3245.8 (1883.8 - 5195.4),     | 2846.42 (1356.6 - 4833),      | 0.06,                      | 0.11,    | Wilcoxon signed rank test with                       |
| Calcium (mg)                          | 619.2 (131.8 - 1893),         | 585.39 (148.5 - 1153.8),      | 0.49,                      | 0.84,    | Paired t-test                                        |

|                 |                           |                           |       |       |                |
|-----------------|---------------------------|---------------------------|-------|-------|----------------|
| Phosphorus (mg) | 1207.64 (662.3 - 2223.1), | 1115.18 (703.4 - 1612.7), | 0.18, | 0.61  | ,Paired t-test |
| Magnesium (mg)  | 283.64 (149.7 - 506.7),   | 250.14 (116.2 - 461.1),   | 0.07, | 0.39, | Paired t-test  |
